# Supplementary material for: Basement membrane proteins in extracellular matrix characterize NF1 neurofibroma development and response to MEK inhibitor
Source: JCI journal article supplement (doi:10.1172/jci168227), 2023-05-04
Supplement: sd1 [file 1]

301 Moved Permanently

# Moved Permanently

The document has moved here.
