# Supplementary material for: Basement membrane proteins in extracellular matrix characterize NF1 neurofibroma development and response to MEK inhibitor
Source: JCI journal article supplement (doi:10.1172/jci168227), 2023-05-04
Supplement: sd1 [file 1]

## **Supplemental Figures and Tables for:**

### **Basement membrane proteins in extracellular matrix characterize NF1 neurofibroma development and response to MEK inhibitor**

Chunhui Jiang<sup>1</sup>, Ashwani Kumar<sup>2</sup>, Ze Yu<sup>2</sup>, Tracey Shipman<sup>1</sup>, Yong Wang<sup>1</sup>, Renee M. McKay<sup>1</sup>, Chao Xing<sup>2,3</sup>, and Lu Q. Le<sup>1,4,5,6,7</sup>

<sup>1</sup>Department of Dermatology, <sup>2</sup>Eugene McDermott Center for Human Growth and Development, <sup>3</sup>Lyda Hill Department of Bioinformatics, <sup>4</sup>Simmons Comprehensive Cancer Center, <sup>5</sup>UTSW Comprehensive Neurofibromatosis Clinic, <sup>6</sup>Hamon Center for Regenerative Science and Medicine, <sup>7</sup>O'Donnell Brain Institute, University of Texas Southwestern Medical Center at Dallas, Dallas, Texas, 75390-9069, USA

#### **\*Corresponding Author:**

Lu Q. Le, M.D., Ph.D.  
Professor of Dermatology  
Hamon Center for Regenerative Science and Medicine  
Simmons Comprehensive Cancer Center  
O'Donnell Brain Institute  
University of Texas Southwestern Medical Center  
5323 Harry Hines Blvd  
Dallas, TX 75390-9069  
Phone: (214) 648-5781  
Fax: (214) 648-5553  
E-mail: [Lu.Le@UTSouthwestern.edu](mailto:Lu.Le@UTSouthwestern.edu)

**Running title:** Basement membrane proteins in neurofibroma growth and treatment response

**Keywords:** plexiform neurofibroma, extracellular matrix, basement membrane, TGF- $\beta$ 1, macrophages, mass spectrometry, single-cell RNA-sequencing

The authors declare no potential conflicts of interest.

**A**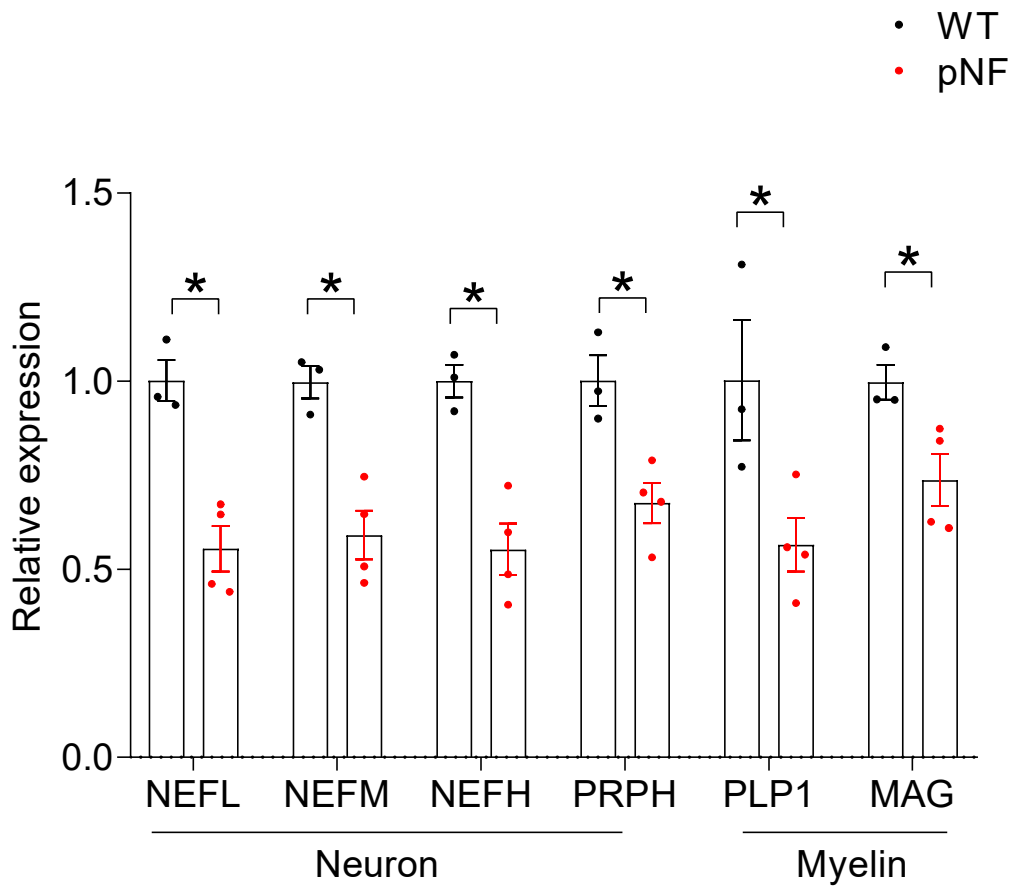**B**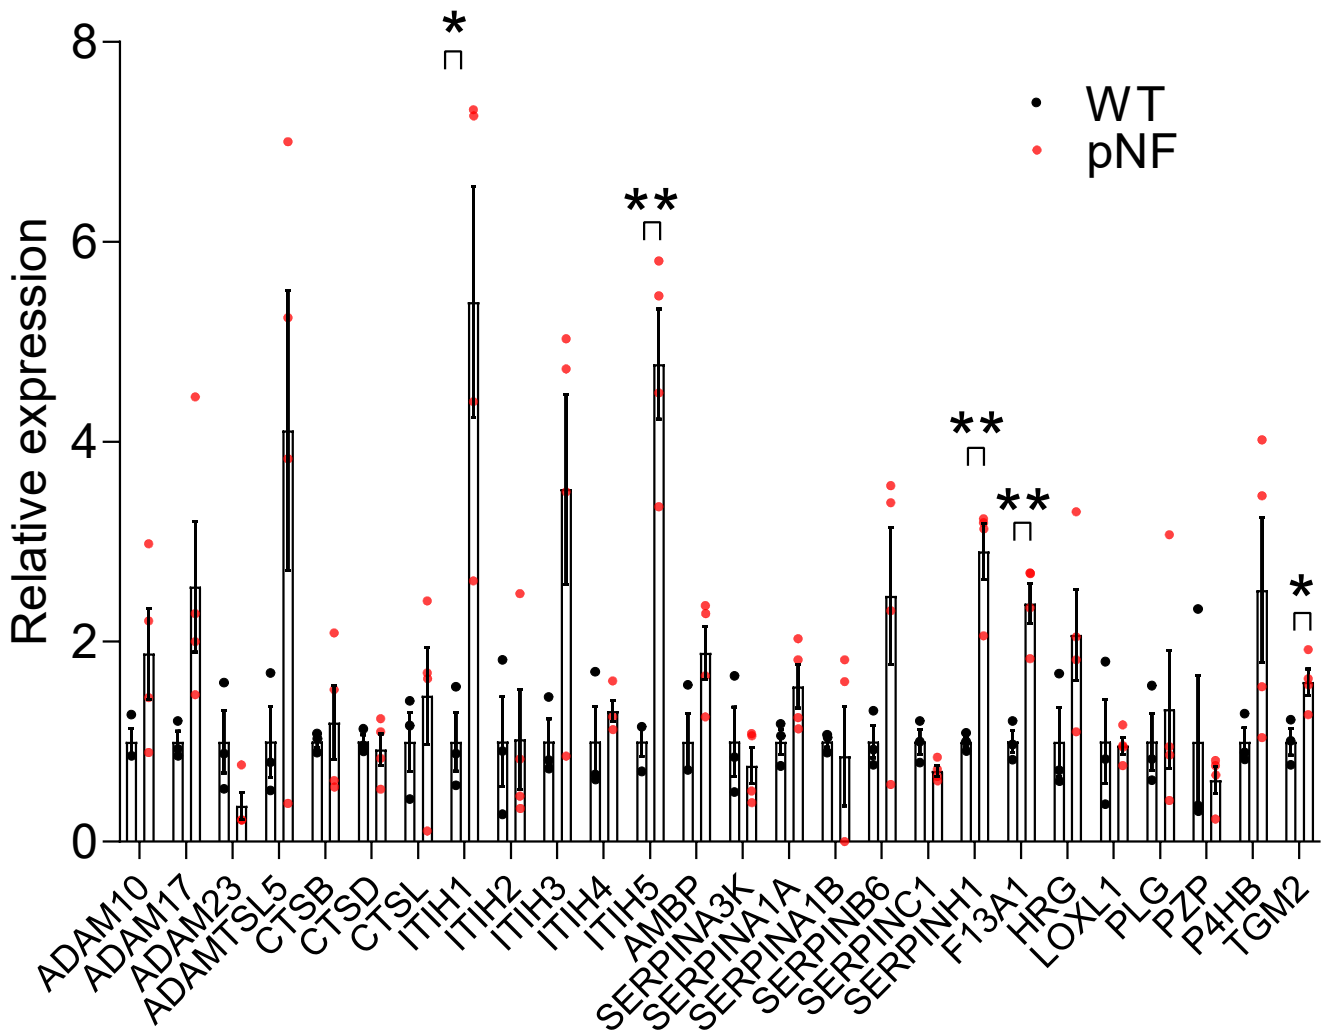

**Supplemental Figure 1. Mass spectrometry data analysis between WT and pNF.** (A) Mass spectrometry data reveals down-regulation of neuron- and myelination-related targets in pNF based on abundance ratios. NEFL, neurofilament light chain; NEFM, neurofilament medium chain; NEFH, neurofilament heavy chain; PRPH, peripherin; PLP1, proteolipid protein 1; MAG, myelin-associated glycoprotein. (B) Mass spectrometry data reveals up-regulation of several ECM regulators in pNF based on abundance ratios. Data are shown as the means  $\pm$  s.e.m. Comparisons among groups were performed by student's t test. \*  $P < 0.05$ . \*\*  $P < 0.01$ .

**A**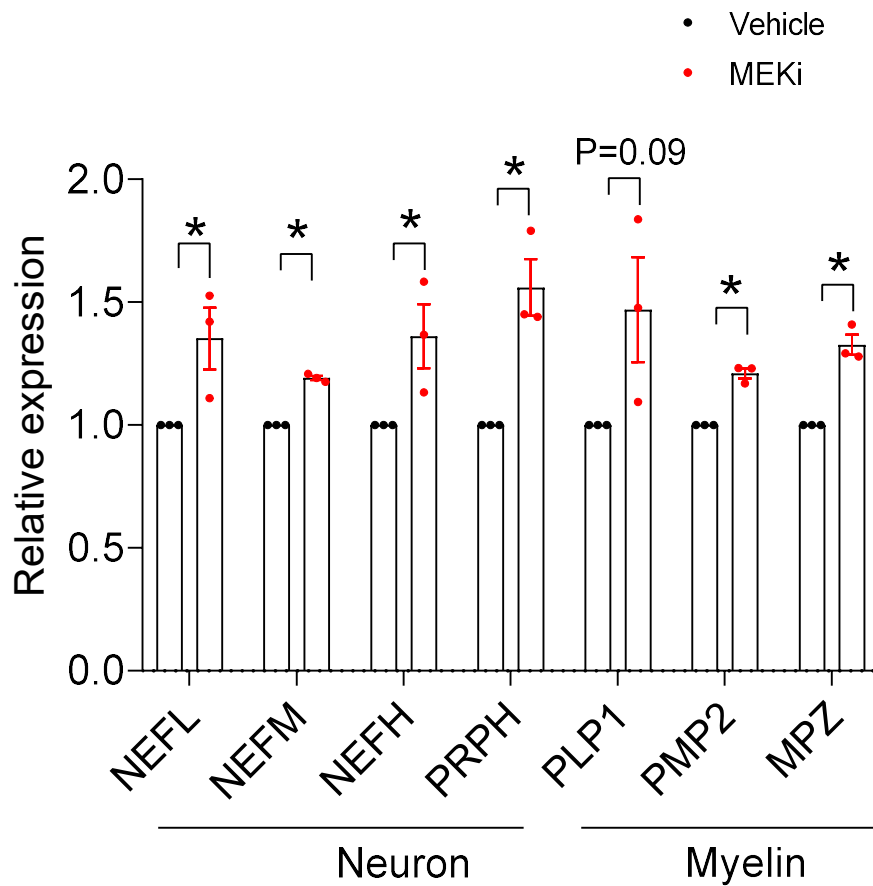**B**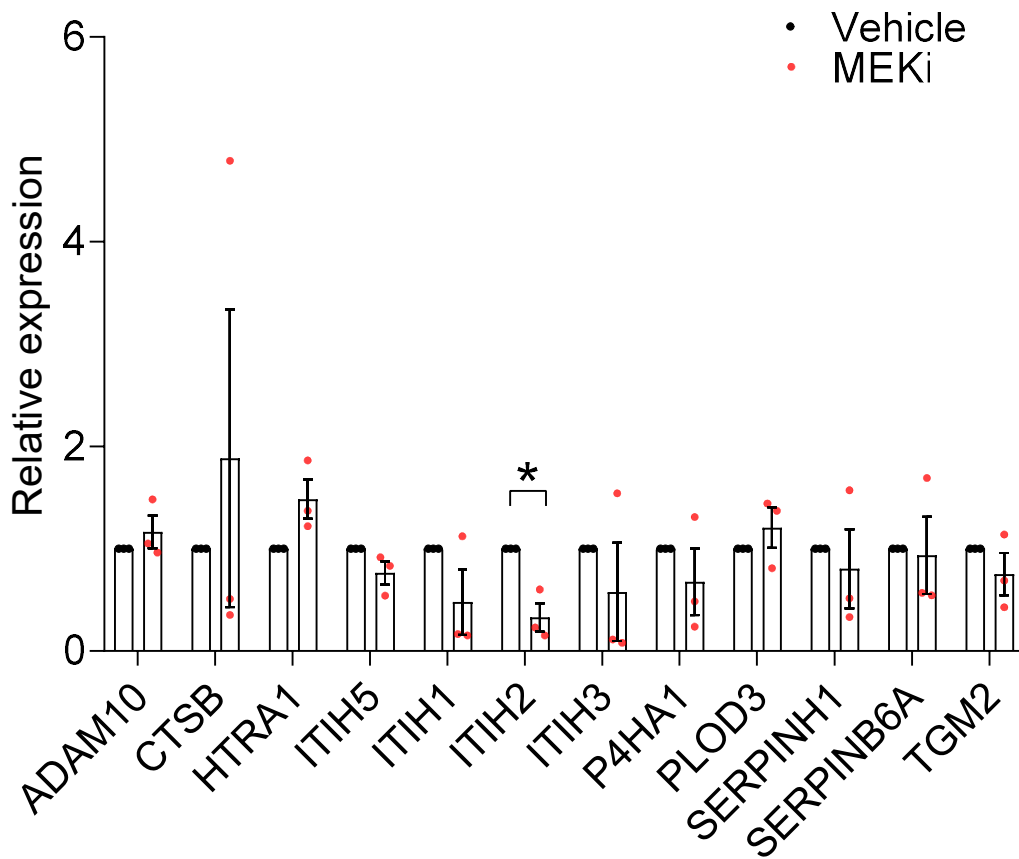

**Supplemental Figure 2. Mass spectrometry data analysis between MEKi and Vehicle treated pNF DRGs.**

**(A)** Mass spectrometry data reveals up-regulation of neuron- and myelination-related targets in MEKi-treated group based on abundance ratios. NEFL, neurofilament light chain; NEFM, neurofilament medium chain; NEFH, neurofilament heavy chain; PRPH, peripherin; PLP1, proteolipid protein 1; MAG, myelin-associated glycoprotein. **(B)** Mass spectrometry data reveals expression of ECM regulators between MEKi and Vehicle treated pNF DRGs. Data are shown as the means  $\pm$  s.e.m. Comparisons among groups were performed by student's t test. \*  $P < 0.05$ .

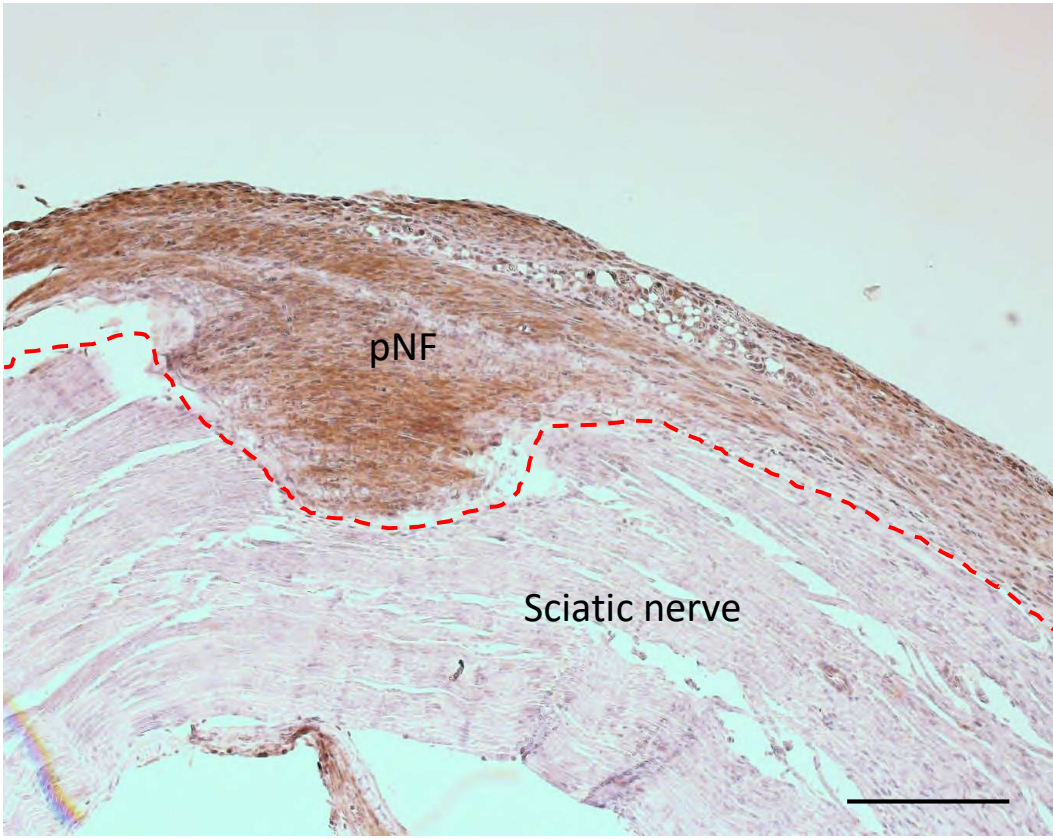

**Supplemental Figure 3. High expression of TGF- $\beta$ 1 in pNF compared to the normal sciatic nerve region.**

Representative immunohistochemistry image showing the expression of TGF- $\beta$ 1 in the sciatic nerve of a nude mouse transplanted with E13.5 DRG neurosphere cells. The dashed red line indicates the tumor-nerve boundary.

Scale bar, 200  $\mu$ m.

**A**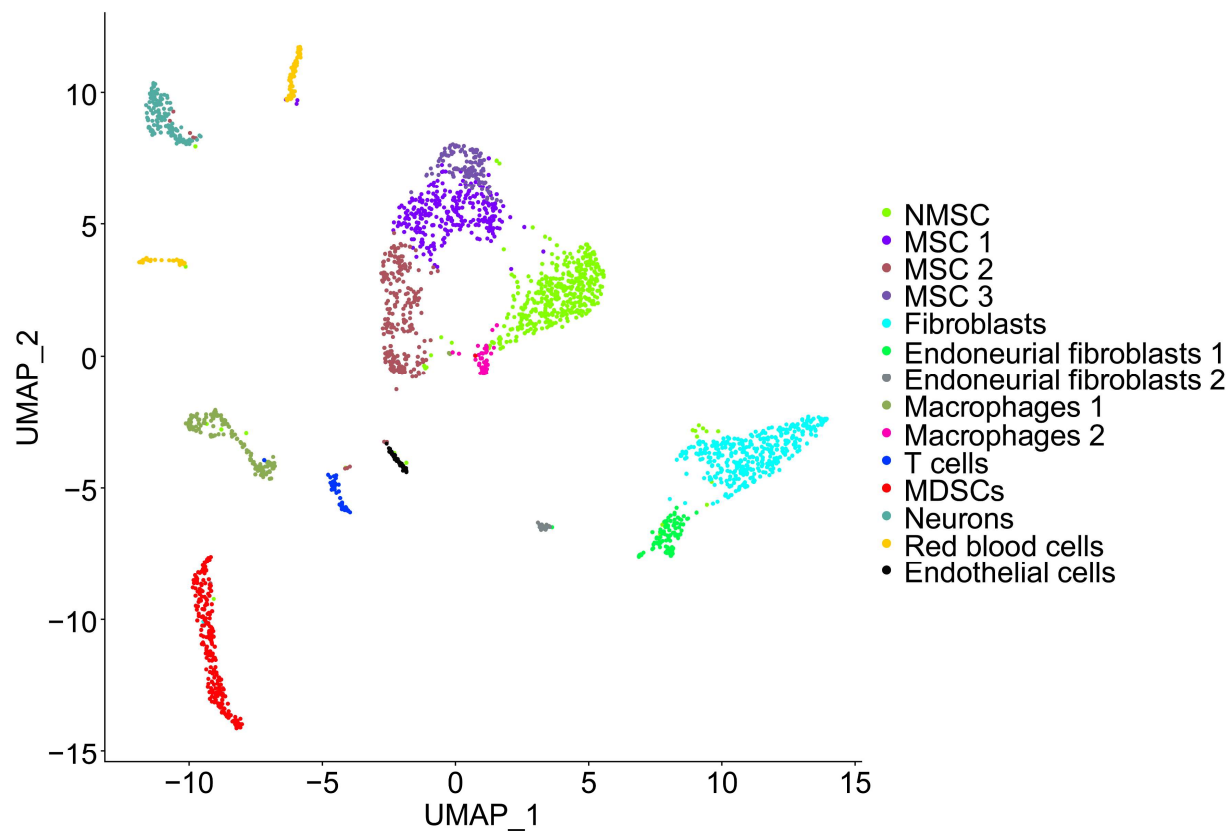**B**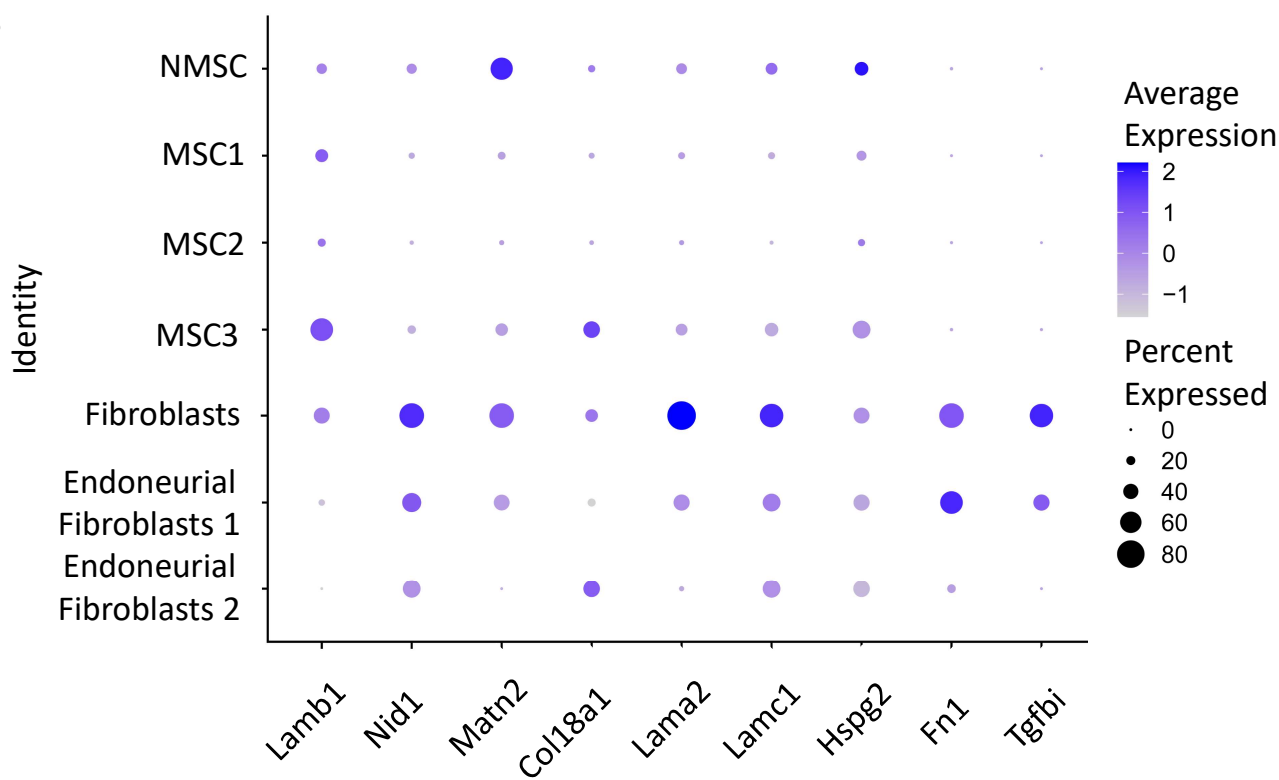**C**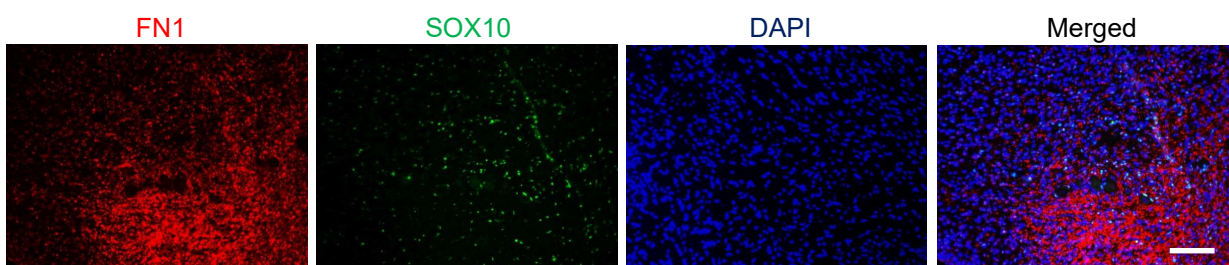**D**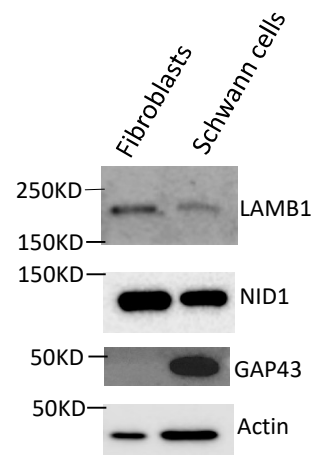



**Supplemental Figure 4. Sc RNA-seq analysis verified by biochemical experiments.** (A) A Uniform Manifold Approximation and Projection (UMAP) plot showing the cell populations identified by scRNA-Seq. NMSC, non-myelinating Schwann cells; MSC, myelinating Schwann cells; MDSC, myeloid-derived suppressor cells. (B) Dot plot showing the expression of indicated BM proteins in Schwann cells and fibroblasts. (C) Immunofluorescence images showing co-immunofluorescence of FN1 and SOX10 in mouse pNF tissue. Scale bar, 100  $\mu$ m. (D) Representative western blots showing the expression of LAMB1 and NID1 in primary fibroblasts and Schwann cells. GAP43 was used as a marker for Schwann cells.

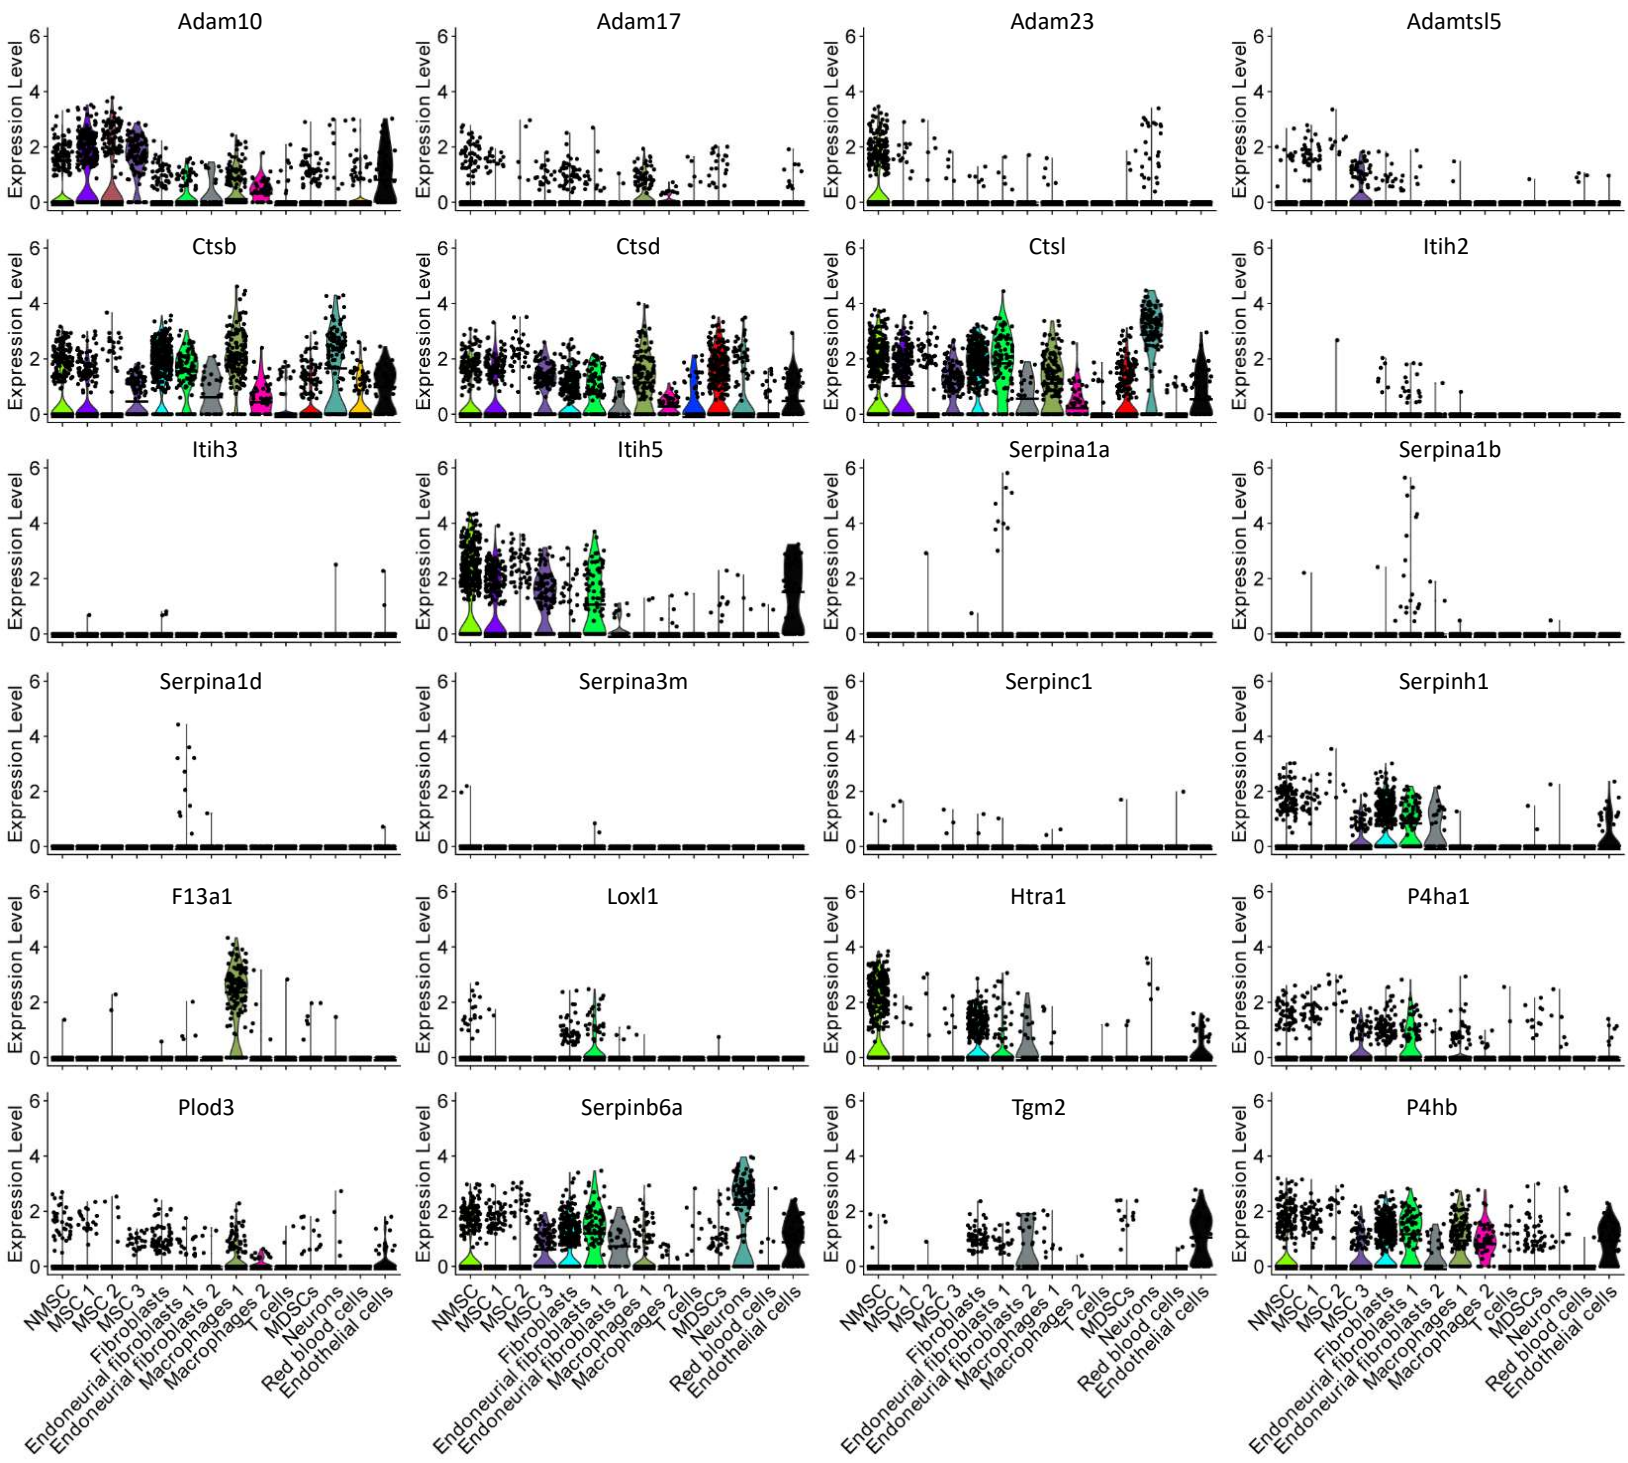

**Supplemental Figure 5. Expression of ECM regulators in pNF.** Violin plots showing the expression of indicated ECM regulators in different cell populations. NMSC, non-myelinating Schwann cells; MSC, myelinating Schwann cells; MDSC, myeloid-derived suppressor cells.

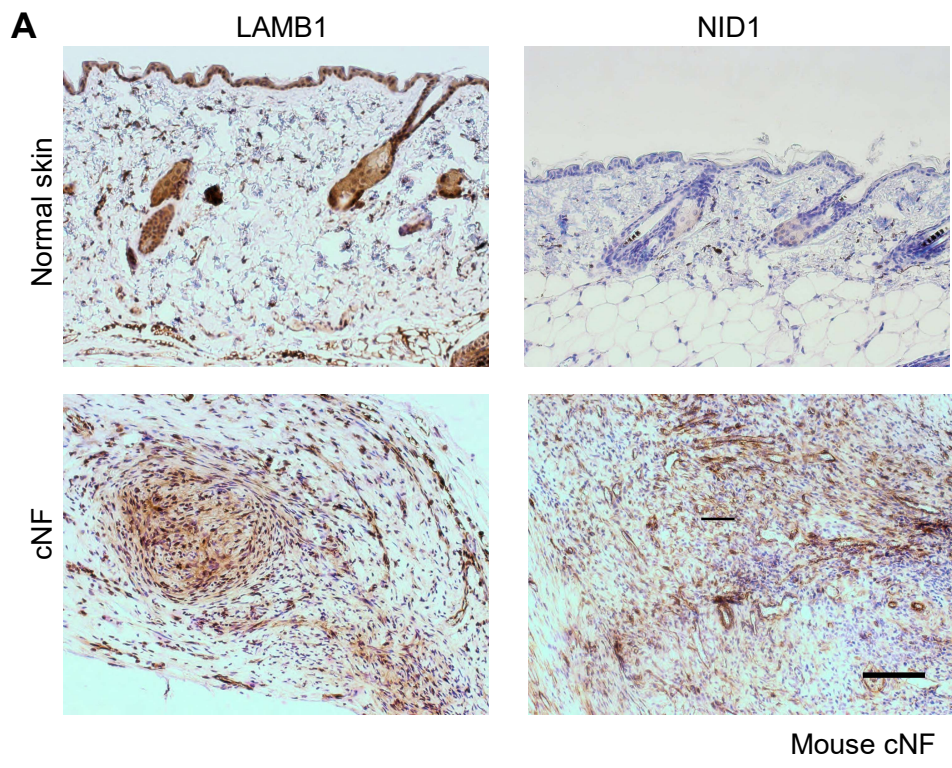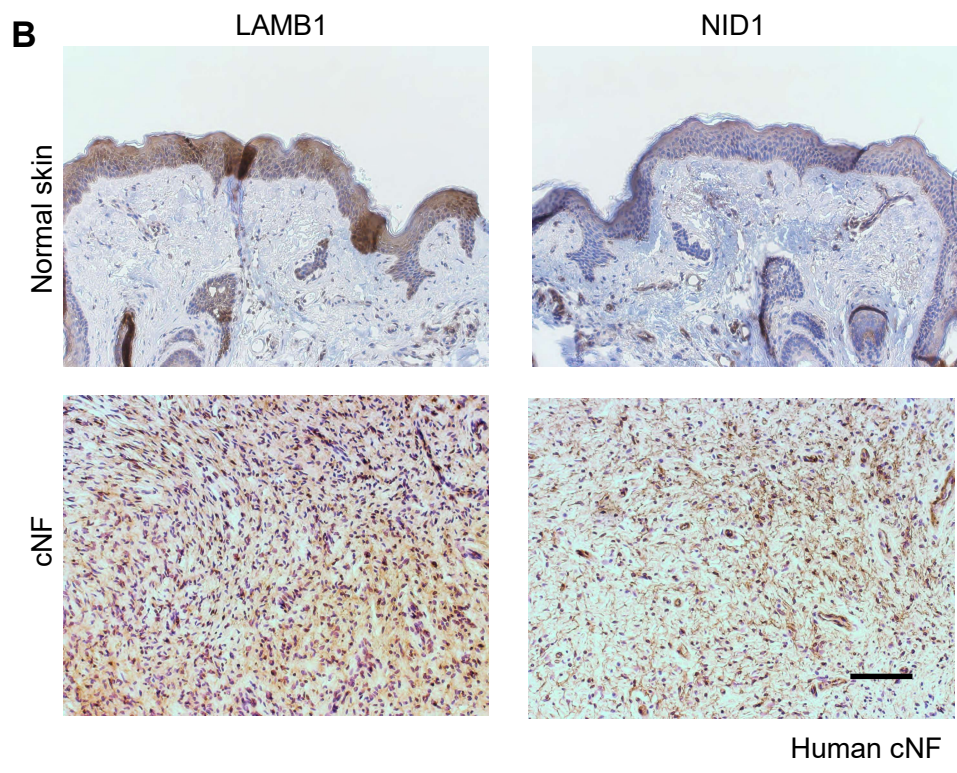

**Supplemental Figure 6. BM protein expression in mouse and human cNF.** (A) Representative immunohistochemistry image showing the expression of LAMB1 and NID1 in mouse cNF and normal skin. Scale bar, 100  $\mu\text{m}$ . (B) Representative immunohistochemistry image showing the expression of LAMB1 and NID1 in human cNF and normal skin. Scale bar, 100  $\mu\text{m}$ .

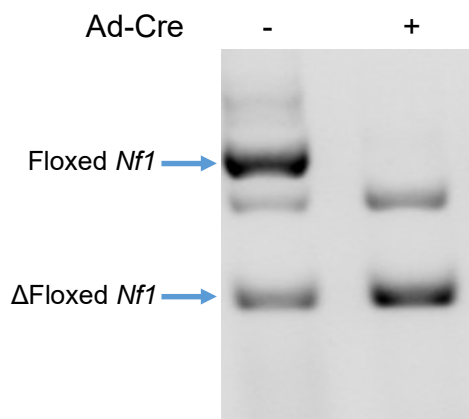

**Supplemental Figure 7. Deletion of *Nf1* in *Nf1<sup>fl/fl</sup>* E13.5 DRGs following transduction with adenovirus-Cre.**

A representative genotyping agarose gel image showing the loss of *Nf1* in *Nf1<sup>fl/fl</sup>* E13.5 DRG neurosphere cells after transduction with adenovirus-Cre.

| <b>Antibody</b>            | <b>Company</b>    | <b>Identifier</b> |
|----------------------------|-------------------|-------------------|
| Rabbit anti-LAMB1          | Thermo Fisher     | PA5-27271         |
| Rabbit anti-NID1           | Abcam             | ab254325          |
| Rabbit anti-p-ERK          | Cell Signaling    | 4370L             |
| Rabbit anti-ERK            | Cell Signaling    | 4695S             |
| Mouse anti-Actin           | Sigma             | A5441             |
| Rabbit anti-Vinculin       | Abcam             | ab91459           |
| Rabbit anti-TGF- $\beta$ 1 | Novus Biologicals | NBP1-03276        |
| Mouse anti-TGF- $\beta$ 1  | Santa Cruz        | sc-130348         |
| Rabbit anti-S100 $\beta$   | Abcam             | ab52642           |
| Rabbit anti-SOX10          | Abcam             | ab180862          |
| Rabbit anti-FN1            | Sigma             | F3648             |
| Goat anti-SOX10            | R&D Systems       | AF2864            |
| Rabbit anti-IBA1           | WAKO              | 019-19741         |
| Rat anti-CD3               | Abcam             | ab11089           |
| Chicken anti-GAP43         | Novus Biologicals | NBP1-92714        |

**Supplemental Table 1. Antibody information.**



| <b>Gene Symbol</b> | <b>Primer Sequence (5'-3')</b>                          |
|--------------------|---------------------------------------------------------|
| <i>Col1a1</i>      | F: ATGGATTCCAGTTCGAGTAGGC<br>R: CATCGACAGTGACGCTGTAGG   |
| <i>Col1a2</i>      | F: ATGCCTAGCAACATGCCAATC<br>R: CAGCAAAGTTCCCACCGAGA     |
| <i>Col3a1</i>      | F: TTTTGCAGTGATATGTGATGTT<br>R: GGATGGTGGTTTTTCAGTTTA   |
| <i>Col4a1</i>      | F: GGACTACCTGGAACAAAAGGG<br>R: GCCAAGTATCTCACCTGGATCA   |
| <i>Col6a1</i>      | F: ACAGTGACGAGGTGGAGATCA<br>R: GATAGCGCAGTCGGTGTAGG     |
| <i>Fn1</i>         | F: CCAGTCCTACAACCAGTATTCTC<br>R: CTTCTCTGTCAGCCTGTACATC |
| <i>Lama2</i>       | F: TGCTGTCTGAATCTTGCTTC<br>R: AGCATTGTAATCGGGTGTCTC     |
| <i>Lamb1</i>       | F: AGGAACCCGAGTTCAGCTAC<br>R: CACGTCGAGGTCACCGAAA       |
| <i>Lamc1</i>       | F: GGACTCCGCCCGAGGAATA<br>R: ACTTGAGACGCACATAGGTGA      |
| <i>Nid1</i>        | F: CGGGGATGACTTCGTCTCTC<br>R: GTGGTGACGTAGACTGCGT       |
| <i>Hspg2</i>       | F: CCAAATGCGCTGGACACATTC<br>R: CGGACACCTCTCGGAACTCT     |
| <i>18s</i>         | F: ACCGCAGCTAGGAATAATGGA<br>R: GCCTCAGTTCCGAAAACCA      |

**Supplemental Table 2. qPCR primer sequences.**
